# Supplementary material for: Weighted Gene Co-expression Network Analysis Identifies Crucial Genes Mediating Progression of Carotid Plaque
Source: Front Physiol. 2021 Feb 5;12:601952. doi: 10.3389/fphys.2021.601952 (PMC7894049; doi:10.3389/fphys.2021.601952)
Supplement: Supplementary Table 4 — KEGG pathways of gene modules for advanced plaque and early plaque. [file Table_4.XLSX]

## Sheet: Sheet1
Table S4. KEGG pathways of gene modules for advanced plaque and early plaque
ID	Description	p.adjust	geneID	Count
Advanced_Black
hsa04142	Lysosome	4.38064e-24	54/162/130340/411/427/537/535/527/9114/245972/51606/967/1201/1497/5476/1508/1075/1509/1512/1514/1520/1522/1777/58511/2517/2519/2581/2588/26088/2717/2760/79158/84572/2799/2990/3073/3074/138050/3482/3916/3920/27074/7805/5641/3988/9516/4074/4125/4126/57192/4668/51172/4758/4864/10577/23659/5538/5660/950/6556/4891/26503/285362/1200	64
hsa04145	Phagosome	6.53113e-15	60/537/535/527/9114/245972/523/526/528/51382/51606/811/821/929/30835/948/64581/81035/1514/1520/1536/1778/2212/2213/3105/3106/3107/3108/3109/3111/3113/3115/3122/3133/3134/3678/3684/3689/3916/3920/4074/8685/4360/4481/653361/4688/4689/4973/5878/338382/5879/949/6890/7037/7057/7097/7099/203068	58
hsa04380	Osteoclast differentiation	2.42502e-11	54/695/1435/1436/2212/2213/2534/2885/3454/3459/3460/3551/10379/3716/3937/11027/353514/79168/10859/10288/11025/11006/10990/5604/9020/5603/5599/4286/653361/4688/4689/4773/4792/126014/8503/5336/5468/5879/140885/10326/6772/6773/6850/7006/8792/54209/7305	47
hsa05152	Tuberculosis	7.37813e-11	537/535/527/9114/245972/51606/836/841/929/30835/972/1051/4261/26253/64581/1378/1509/1520/1594/2033/2207/2212/2213/3108/3109/3111/3113/3115/3122/3313/3459/3460/3586/3587/3588/3606/3656/3684/3687/3689/3716/3916/3920/4046/10892/5603/5599/4360/4615/64127/5878/5993/8767/6772/6850/7097/7099	57
hsa04662	B cell receptor signaling pathway	8.0364e-08	695/971/2213/2885/3551/3635/11027/353514/79168/10859/10288/11025/11006/10990/4067/10892/5604/4773/4792/4794/4893/118788/8503/5336/5777/5879/5880/25780/6850/7409/10451	31
hsa05323	Rheumatoid arthritis	1.20761e-07	54/537/535/527/9114/245972/523/526/528/51382/51606/6352/941/942/1435/1514/3108/3109/3111/3113/3115/3122/3383/3606/3683/3689/4312/7010/7097/7099/8792/8741/10673	33
hsa05145	Toxoplasmosis	1.20761e-07	240/598/329/836/841/1234/4261/2771/3108/3109/3111/3113/3115/3122/3306/3459/3460/3551/3586/3587/3588/3655/3716/3912/3913/5603/5599/4615/4792/5294/23533/146850/10105/6772/6774/7097/7099	37
hsa05416	Viral myocarditis	1.94362e-07	27/60/836/841/941/942/1525/1981/2534/3105/3106/3107/3108/3109/3111/3113/3115/3122/3133/3134/3383/3683/3689/5879/5880	25
hsa04612	Antigen processing and presentation	2.39696e-07	567/811/821/920/972/4261/1508/1514/1520/3105/3106/3107/3108/3109/3111/3113/3115/3122/3133/3134/3306/3309/3824/5641/2923/5720/5993/6890/6892	29
hsa05135	Yersinia infection	3.1774e-07	60/10097/10096/10094/10092/10458/834/920/998/1398/9844/2212/9815/3551/3586/3606/3676/3678/3937/5604/5603/5599/4210/4615/4773/4792/58484/114548/8503/2185/5879/5880/391/6195/6196/6197/7099/7409/10451/7454/7456	41
hsa05169	Epstein-Barr virus infection	3.49848e-07	567/10018/695/811/836/841/896/9134/3105/3106/3107/3108/3109/3111/3113/3115/3122/3133/3134/3383/3454/3551/10379/3683/3716/4067/9020/5603/5599/4193/4609/4615/4792/4794/4938/4939/4940/2923/8503/5336/5879/5925/8737/6772/6773/6774/6850/6890/6892/7097/7128/7157/7187	53
hsa05167	Kaposi sarcoma-associated herpesvirus infection	4.70604e-07	8678/836/841/1230/1233/1234/942/1499/2033/2247/11345/2782/54331/3055/3091/3105/3106/3107/3133/3134/3383/3454/3459/3551/10379/3716/4067/5604/5603/5599/9261/4277/4609/4773/4792/4893/5294/8503/23533/146850/5336/5879/5925/1827/6772/6773/6774/6850/7157/7187/7314	51
hsa05132	Salmonella infection	9.45055e-07	60/10121/10097/10096/302/127829/55207/10094/10092/329/834/836/840/841/929/998/1499/23191/9267/27128/1785/1778/9844/55770/2318/3551/3606/4074/5604/5603/5599/197259/4609/4615/4671/3071/4792/58484/114548/5216/5294/9842/5788/5878/338382/9367/5879/5898/391/399/8737/8767/11035/6281/7097/7099/7100/8797/8795/203068	60
hsa04621	NOD-like receptor signaling pathway	9.45055e-07	598/329/114769/84674/22900/834/841/6352/1508/1536/11345/115361/115362/3428/3454/3551/3606/10379/3716/5603/5599/4210/4615/4671/10135/4792/58484/91662/114548/64127/4938/4939/4940/5027/5330/5580/8737/8767/11035/6041/6772/6773/7099/7128/7187/51393/7416/7531	48
hsa04062	Chemokine signaling pathway	2.36351e-06	408/409/6357/6362/6351/6352/1230/2826/1233/1234/1236/998/1398/58191/7852/1794/9844/2268/2771/2782/54331/2885/2870/3055/3551/4067/5604/653361/4792/4893/5294/8503/23533/146850/5330/5336/5580/2185/5879/5880/10235/6772/6773/6774/6777/7074/7409/10451/7454	49
hsa05140	Leishmaniasis	7.26939e-06	1378/1536/2212/3108/3109/3111/3113/3115/3122/3459/3460/3586/3676/3684/3689/3716/5603/4615/653361/4688/4689/4792/5777/6772/7097/7099	26
hsa05164	Influenza A	7.26939e-06	60/834/836/841/6352/896/4261/2033/3108/3109/3111/3113/3115/3122/11100/3383/64135/3454/3459/3460/3551/3606/10379/3716/3838/5604/4599/4600/4615/4792/114548/4938/4939/4940/8503/6041/91543/6772/6773/7099/8797/8795/7187/7416	44
hsa04666	Fc gamma R-mediated phagocytosis	7.75923e-06	10097/10096/10094/10092/50807/998/1072/1398/1785/2212/2213/3055/3635/4067/5604/4082/653361/8503/5321/5336/5580/5788/5879/5880/85477/6850/7408/7409/10451/7454	30
hsa05120	Epithelial cell signaling in Helicobacter pylori infection	1.30593e-05	102/537/535/527/9114/245972/523/526/528/51382/51606/836/6352/998/50848/1839/3551/4067/9020/5603/5599/4792/5336/5879	24
hsa05162	Measles	2.15566e-05	598/836/841/896/9134/30835/27102/9451/2213/3306/64135/3454/3551/3559/3561/10379/3716/5599/4599/4600/4615/4792/4938/4939/4940/8503/9367/6772/6773/6774/6776/6777/7097/7099/7128/7157/7187	37
hsa05203	Viral carcinogenesis	2.97332e-05	9114/245972/836/841/896/9134/1233/1234/998/983/1029/1030/1654/1959/2033/2885/79885/3105/3106/3107/3133/3134/10379/3716/4055/4067/8379/9261/4193/4792/4893/8503/5366/5879/5925/5966/85477/6774/6776/6777/6850/7157/7187/55697/7529/7531/7533/7534	48
hsa05166	Human T-cell leukemia virus 1 infection	4.4271e-05	567/598/9184/811/821/896/9134/920/1029/1030/1959/2033/3105/3106/3107/3108/3109/3111/3113/3115/3122/3133/3134/3383/3551/3559/3561/3683/3689/3716/4055/8379/5604/9020/5599/4316/4487/4609/4773/4792/4893/8829/8503/5925/6513/6776/6777/7157/55697/7416	50
hsa04650	Natural killer cell mediated cytotoxicity	9.16164e-05	836/2207/2534/2885/10870/3105/3106/3107/3133/3383/3454/3459/3460/3683/3689/3824/3937/5604/4277/4773/4893/8503/5336/2185/5777/5879/5880/6452/6850/8797/8795/7305/7409/10451	34
hsa05163	Human cytomegalovirus infection	9.16164e-05	11214/9826/567/811/836/841/6351/6352/1230/1234/1029/1398/1499/7852/1978/10672/2771/2782/54331/2885/3105/3106/3107/3133/3134/3551/3587/3588/3570/3716/5604/5603/4193/4609/4773/4792/4893/2923/8503/5330/2185/5879/5880/5925/8737/6667/6774/6890/6892/7157	50
hsa04216	Ferroptosis	0.000104657	2180/51703/10533/1536/2495/2512/2729/81631/8031/6303/4891/64116/6520/55240/7037/7157	16
hsa05130	Pathogenic Escherichia coli infection	0.000115049	60/10097/10096/9826/10094/10092/10458/834/836/840/841/998/23191/9267/27128/7430/2212/2534/10672/3059/3551/3606/5603/5599/4615/4643/4542/4644/55930/4671/4690/3071/4792/114548/5062/5777/5879/8737/7099/7100/7009/8797/8795/203068/7456	45
hsa04210	Apoptosis	0.000187	60/597/598/10018/329/835/836/840/841/1439/1508/1075/1509/1512/1514/1520/1522/9451/3551/4001/5604/9020/5599/4170/4792/4893/142/143/8503/5366/8737/8797/8795/7157	34
hsa04670	Leukocyte transendothelial migration	0.000194735	60/998/1003/1499/7852/1536/7430/50848/2771/3383/3676/3683/3684/3689/5603/4318/653361/4688/4689/5175/8503/5336/2185/5879/5880/83593/399/7408/7409/10451	30
hsa04144	Endocytosis	0.000214739	10097/10096/163/1173/1175/116985/381/10094/10092/408/409/50807/830/1234/998/57132/7852/9267/27128/1785/30844/2264/2350/9815/2870/3105/3106/3107/3133/3134/3306/3482/3559/3561/4193/23327/23362/23550/10890/80223/11031/11021/5878/4218/60682/64744/27131/58533/51324/7037/155382/7456/11059	53
hsa04514	Cell adhesion molecules	0.000214739	23705/80381/920/941/942/1003/50848/3105/3106/3107/3108/3109/3111/3113/3115/3122/3133/3134/3383/3676/3655/3683/3684/3689/3695/3897/22829/80380/5175/5788/6383/9672/6401/6404/6614/201633	36
hsa04664	Fc epsilon RI signaling pathway	0.000246738	240/241/695/2207/2534/2885/3635/3937/4067/5604/5603/5599/4893/8503/5321/5336/5879/5880/6850/7409/10451	21
hsa04672	Intestinal immune network for IgA production	0.00026565	2826/941/942/7852/3108/3109/3111/3113/3115/3122/3586/3676/3695/4055/9020/8741/10673	17
hsa05321	Inflammatory bowel disease	0.000382841	3108/3109/3111/3113/3115/3122/3459/3460/3586/3594/3606/3561/4094/64127/6772/6774/6775/7097/7099/7100	20
hsa04658	Th1 and Th2 cell differentiation	0.000447181	920/3108/3109/3111/3113/3115/3122/3459/3460/3551/3594/3559/3561/3716/4094/5603/5599/4773/4792/4794/4853/6772/6775/6776/6777	25
hsa04625	C-type lectin receptor signaling pathway	0.000512714	834/841/30835/26253/64581/1959/2207/3551/3586/10379/4046/10892/9020/5603/5599/9261/4193/4773/4792/114548/4893/8503/5336/5580/6772/6773/6850	27
hsa05161	Hepatitis B	0.000512714	537/836/841/9134/1654/1959/2033/2885/64135/3454/3551/3716/5604/5603/5599/4318/4609/4615/4773/4792/4893/5111/8503/2185/5925/6772/6773/6774/6775/6776/6777/7097/7099/7157/7187/7529/7534	37
hsa04640	Hematopoietic cell lineage	0.000538774	290/929/945/948/951/920/966/1378/1435/1436/1438/1441/3108/3109/3111/3113/3115/3122/3559/3570/3676/3678/3655/3684/4311/7037	26
hsa05330	Allograft rejection	0.000538774	941/942/3105/3106/3107/3108/3109/3111/3113/3115/3122/3133/3134/3586	14
hsa05160	Hepatitis C	0.00054413	836/841/1499/27102/9451/2885/3454/3551/10379/3716/5604/4599/4600/4609/4792/10062/4893/4938/4939/4940/8503/5515/5925/8737/6041/91543/949/6772/6773/6774/7157/7187/7529/7531/7533/7534	36
hsa00511	Other glycan degradation	0.000662537	64772/2517/2519/3073/3074/4125/4126/4758/10825	9
hsa04659	Th17 cell differentiation	0.0007628	196/920/3091/3108/3109/3111/3113/3115/3122/3459/3460/3551/3594/9466/3559/3561/3570/3716/5603/5599/4773/4792/4794/6772/6774/6776/6777	27
hsa05219	Bladder cancer	0.00126021	1029/1612/1613/1839/5604/4193/4312/4318/4609/4893/5925/7057/7157/1890	14
hsa05332	Graft-versus-host disease	0.00164614	941/942/3105/3106/3107/3108/3109/3111/3113/3115/3122/3133/3134/3824	14
hsa05134	Legionellosis	0.00164614	834/836/840/841/929/1378/3306/3606/3684/3689/4615/4671/4792/58484/7097/7099/7100	17
hsa04722	Neurotrophin signaling pathway	0.00186333	397/998/1398/2885/3551/3656/5604/5603/5599/9261/4792/4794/4893/4915/8503/5336/5580/5663/5664/5879/2889/8767/6195/6196/6197/10019/7157/7531	28
hsa05150	Staphylococcus aureus infection	0.00186333	712/713/714/717/719/728/2212/2213/2357/2358/2359/3108/3109/3111/3113/3115/3122/3383/3586/3683/3684/3689/5724/6404	24
hsa05170	Human immunodeficiency virus 1 infection	0.00186333	162/130340/567/598/811/836/841/1234/920/983/1072/1398/7852/2771/2782/54331/3105/3106/3107/3133/3134/3551/5604/5603/5599/4615/4773/4792/4893/5062/2923/8503/5336/2185/5879/5880/8737/25939/6890/6892/7097/7099/7133	43
hsa04064	NF-kappa B signaling pathway	0.00262134	597/598/329/695/6357/6351/929/3383/3551/4055/4067/10892/9020/4615/4792/142/5328/5336/8737/6850/7099/7128/8792/10673/7187	25
hsa05133	Pertussis	0.00274601	712/713/714/717/834/836/840/929/1072/2771/3586/3394/3678/3684/3689/5603/5599/4615/114548/7099	20
hsa04217	Necroptosis	0.00274601	329/834/841/57132/1536/2495/2512/2746/2752/3454/3459/3460/10379/3716/5599/197259/114548/142/5321/5836/8737/11035/6772/6773/6774/6775/6776/6777/7099/7128/8797/8795/27005/7416	34
hsa04979	Cholesterol metabolism	0.00294771	19/341/344/348/948/1593/3988/4023/57552/4864/10577/5360/949/6646/7416	15
hsa05110	Vibrio cholerae infection	0.00294771	60/537/535/527/9114/245972/523/526/528/51382/51606/3784/11014/9601/5336	15
hsa05144	Malaria	0.00294771	948/1378/3082/3383/3586/3606/3683/3689/4615/5175/6383/6401/7057/7097/7099	15
hsa05205	Proteoglycans in cancer	0.00302419	60/836/967/998/1278/1499/1514/7430/2247/2318/2885/1839/3059/3082/3091/10855/3479/3678/5604/5603/4193/4318/4609/4893/8503/5328/5329/5336/5499/5777/5879/6383/6774/7057/7074/7078/7097/7099/7157/7409/10451	41
hsa04611	Platelet activation	0.00315669	60/54518/695/1278/1281/2207/2212/83706/2534/10672/2771/3937/4067/5603/5294/8503/23533/146850/5321/5330/5336/5499/5742/10235/6850/6916/8673/7408	28
hsa04151	PI3K-Akt signaling pathway	0.00332589	374/598/10018/896/9134/1278/1293/1435/1436/1441/1978/2069/2247/2264/2782/54331/2885/3082/3381/3454/3479/3551/3559/3561/3570/3676/3678/3655/3695/3716/3912/3913/10161/5604/4170/4193/64223/4609/4893/4915/5106/118788/5294/8503/23533/146850/5515/5879/6446/6696/6850/7010/7039/7057/7097/7099/3371/7157/7424/7529/7531/7533/7534	63
hsa04140	Autophagy - animal	0.00338677	89849/10533/598/8678/10645/1508/1509/1514/1612/1613/9451/11345/3091/3916/3920/5604/5599/64223/64419/4893/29982/8503/5515/5580/338382/4218/58528/140775/8673/81671	30
hsa04630	JAK-STAT signaling pathway	0.00338677	598/896/1154/1438/1439/1441/2033/2885/3454/3459/3460/163702/3586/3587/3588/3594/9466/3559/3561/3570/10379/3716/3952/4170/4609/8503/5777/9306/6772/6773/6774/6775/6776/6777	34
hsa04115	p53 signaling pathway	0.00367455	598/836/841/896/9134/3732/983/1029/3479/4193/5366/6241/50484/55240/7057/8797/8795/7157/9540	19
hsa04015	Rap1 signaling pathway	0.00451719	60/54518/998/1398/1435/1436/1499/9732/2247/2264/2357/2771/3082/3479/3683/3684/3689/3937/5604/5603/4893/5216/8503/5330/5879/5880/5898/5899/5900/2889/10235/25780/83593/57568/7010/7057/7074/7408/7409/10451/7424	41
hsa00531	Glycosaminoglycan degradation	0.00465688	411/2588/2799/2990/3073/3074/138050/10855	8
hsa04620	Toll-like receptor signaling pathway	0.00484634	841/6351/6352/929/941/942/3454/3551/3663/5604/5603/5599/4615/4792/8503/5879/8737/6696/6772/7097/7099/7100/51311/7187	24
hsa04660	T cell receptor signaling pathway	0.00484634	920/998/2534/2885/3551/3586/3937/10892/5604/9020/5603/5599/4690/4773/4792/4794/4893/5062/8503/5777/5788/7006/7409/10451	24
hsa04810	Regulation of actin cytoskeleton	0.00486122	60/10097/10096/10094/10092/10458/624/998/1072/1398/7852/23191/7430/89846/2247/2264/10672/10788/3676/3678/3655/3681/3683/3684/3687/3689/3695/5604/3071/4893/5062/5216/8503/5499/5879/5880/85477/85464/7074/7114/7409/10451	42
hsa04940	Type I diabetes mellitus	0.00520827	941/942/3105/3106/3107/3108/3109/3111/3113/3115/3122/3133/3134	13
hsa04668	TNF signaling pathway	0.00605268	329/836/840/841/6352/1051/1435/3383/3551/5604/9020/5603/5599/197259/4318/4792/64127/8503/8737/11035/6401/7128/7133/7187/7424	25
hsa04061	Viral protein interaction with cytokine and cytokine receptor	0.00605268	6357/6362/6351/6352/1230/2826/1233/1234/1236/1435/1436/7852/3586/3587/3588/3606/3559/3561/3570/4055/8797/8795/7133	23
hsa05165	Human papillomavirus infection	0.0065727	537/535/527/9114/245972/523/526/528/51382/51606/10134/836/841/896/9134/998/1278/1293/1499/1978/2033/2885/3105/3106/3107/3133/3134/3381/3454/3551/10379/3676/3678/3655/3695/3716/3912/3913/5604/4193/4242/4599/4600/4853/4893/8638/8503/5515/5663/5925/6696/6772/6773/7057/3371/7157/7187/27175	58
hsa05131	Shigellosis	0.00912411	60/10097/10096/10094/10092/598/8678/834/6352/929/998/1398/9267/27128/9844/11345/3059/3099/3551/3606/3678/10892/5603/5599/4193/4615/4671/4792/58484/114548/5216/8503/5330/5336/5580/5879/8737/8767/58528/7099/7100/7157/7314/7321/7416	45
hsa05211	Renal cell carcinoma	0.0111245	998/1398/112399/2033/2885/3082/3091/5604/4893/5062/8503/5546/5879/2889/6513/7039/7428	17
hsa05320	Autoimmune thyroid disease	0.0129593	941/942/3105/3106/3107/3108/3109/3111/3113/3115/3122/3133/3134/3586	14
hsa05212	Pancreatic cancer	0.0129593	598/998/1029/3551/3716/5604/5599/8503/5879/5880/5898/5899/5900/5925/6772/6774/7039/7157	18
hsa04966	Collecting duct acid secretion	0.0129593	535/527/9114/245972/523/526/528/51382/760	9
hsa05202	Transcriptional misregulation in cancer	0.0151552	597/598/329/55589/929/942/5218/1051/1436/1848/2119/2313/2530/3087/8091/3248/3479/3684/3695/51274/4094/4149/4193/4286/4318/4609/8013/5077/5328/5468/5546/5966/6667/6692/7157/7102	36
hsa05142	Chagas disease	0.0160669	1636/624/712/713/714/811/841/6352/2771/3459/3460/3551/3586/5603/5599/4615/4792/8503/5330/5515/7097/7099	22
hsa04510	Focal adhesion	0.0179952	60/329/896/998/1278/1293/1398/1499/2318/2534/2885/3082/3381/3479/3676/3678/3655/3695/3912/3913/5604/5599/5062/29780/64098/8503/5499/5879/5880/2889/6696/7057/3371/7408/7409/10451/7424	37
hsa05210	Colorectal cancer	0.0216057	374/10018/836/1499/2069/2885/5604/5599/4609/4893/8503/5366/5879/5880/5898/5899/5900/7039/7157	19
hsa00603	Glycosphingolipid biosynthesis - globo and isoglobo series	0.0223081	26301/2717/3073/3074/4668/6482	6
hsa04920	Adipocytokine signaling pathway	0.0247153	2180/51703/51094/79602/10645/948/3551/3952/5599/4792/4794/5106/51422/6513/6774/7133	16
hsa04933	AGE-RAGE signaling pathway in diabetic complications	0.025359	836/998/1278/1281/1536/3383/5603/5599/4893/8503/5330/5336/5580/5879/6401/6772/6774/6776/6777/7056/7424	21
hsa03320	PPAR signaling pathway	0.0276944	51/2180/51703/948/1593/1622/2171/2710/4023/4312/10062/4973/5106/123/5360/5468/6319	17
hsa05235	PD-L1 expression and PD-1 checkpoint pathway in cancer	0.0298425	920/3091/3459/3460/3551/3716/5604/5603/4615/4773/4792/4794/4893/8503/5777/6772/6774/7097/7099	19
hsa04010	MAPK signaling pathway	0.0330481	374/408/409/93589/836/929/998/1398/1435/1436/11221/80824/1846/1847/1848/2069/2247/2264/2318/2885/3082/3306/3479/3551/5604/9020/9448/5603/5599/9261/7867/4149/4609/4615/4893/4915/5062/5321/5879/5880/10235/25780/6195/6196/6197/7010/7039/7157/7424	49
hsa04014	Ras signaling pathway	0.0364799	27/598/998/1435/1436/55770/2247/2264/2782/54331/2885/3082/3479/3551/5604/5599/4893/4915/5062/8503/51365/5321/5336/5878/5879/5880/5898/5899/5900/22821/10235/25780/83593/5966/23179/8036/7010/7039/7074/7424	40
hsa04012	ErbB signaling pathway	0.0375875	27/374/1398/1978/2069/2885/1839/5604/5599/4609/4690/4893/5062/8503/5336/6776/6777/7039	18
hsa04610	Complement and coagulation cascades	0.0375875	624/712/713/714/717/719/728/966/1378/2162/3684/3687/3689/5328/5329/5265/7056/11326	18
hsa04215	Apoptosis - multiple species	0.0377057	598/10018/8678/329/836/840/841/5599/5366	9
hsa05221	Acute myeloid leukemia	0.0395016	597/929/1436/1848/1978/2885/3551/3684/5604/4609/4893/8503/6774/6776/6777	15
hsa00513	Various types of N-glycan biosynthesis	0.0493862	2683/2530/3073/3074/4121/4245/11320/11282/6184/3703	10
Advanced_Blue
hsa05414	Dilated cardiomyopathy	4.03608e-13	70/107/108/111/113/115/488/775/782/783/784/59283/1605/1674/1756/3672/8515/22801/3679/8516/3680/3688/3690/3693/4633/5350/6262/6443/6444/6445/7042/7043/7139/7168/7169	35
hsa05410	Hypertrophic cardiomyopathy	3.40016e-10	70/488/775/782/783/784/59283/1605/1674/1756/3672/8515/22801/3679/8516/3680/3688/3690/3693/4633/5565/6262/6443/6444/6445/7042/7043/7139/7168/7169	30
hsa05412	Arrhythmogenic right ventricular cardiomyopathy	3.77664e-09	88/488/775/782/783/784/59283/1000/29119/1605/1674/1756/2697/3672/8515/22801/3679/8516/3680/3688/3690/3693/6262/6443/6444/6445	26
hsa04510	Focal adhesion	3.77664e-09	87/81/857/858/894/1282/1285/1286/1287/1288/1299/1793/1956/2002/2064/2317/3480/3611/3672/8515/22801/3679/8516/3680/3688/3690/3693/4233/4633/10398/4638/5063/55742/5159/8394/8395/5500/4659/4660/5747/399694/7058/7094/7410/7414	45
hsa04020	Calcium signaling pathway	4.28812e-07	107/108/113/115/147/146/488/493/623/775/801/91860/818/845/1131/1909/1956/2064/2066/2769/2774/2915/3270/3269/3360/3708/4638/84876/5137/5159/5256/5260/113026/51196/5335/5350/5733/6262/6263/291/6786	41
hsa04810	Regulation of actin cytoskeleton	4.40501e-07	87/81/10095/623/1073/1131/26999/1793/1956/55740/2246/2260/2263/55970/3672/8515/22801/3679/8516/3680/3688/3690/3693/9170/4628/4629/4633/10398/4638/10787/5063/5159/5217/8394/8395/5500/4659/4660/5747/22800/7410/7414/8976	43
hsa04022	cGMP-PKG signaling pathway	1.95073e-06	107/108/111/113/115/147/146/1388/477/488/493/775/801/91860/10488/1909/3643/3667/3708/3778/3779/10335/10398/4638/4776/4881/4882/5139/8654/5350/5500/4659/5592/291/6722	35
hsa04270	Vascular smooth muscle contraction	2.85577e-06	59/72/107/108/111/113/115/133/147/146/775/800/801/91860/1909/3708/3778/3779/10335/4628/4629/4637/10398/4638/4881/4882/5500/4659/4660/5592	30
hsa04390	Hippo signaling pathway	1.13444e-05	84962/154796/8313/652/657/658/659/894/1454/29119/1740/1741/1742/9231/1856/2246/8321/8322/8323/3398/26524/85407/84612/5500/5521/11186/4092/7005/7042/7043/126374/10413	32
hsa04921	Oxytocin signaling pathway	2.08104e-05	107/108/111/113/115/775/782/783/784/59283/801/91860/818/1956/2002/2353/2775/3708/3760/4637/10398/4638/4776/4881/4882/5500/4659/4660/5565/6262/6263	31
hsa04261	Adrenergic signaling in cardiomyocytes	3.3084e-05	70/107/108/111/113/115/147/146/1388/477/488/493/775/782/783/784/59283/801/91860/818/10488/4633/5350/5500/5521/5523/6262/7139/7168/7169	30
hsa04512	ECM-receptor interaction	6.70136e-05	1282/1285/1286/1287/1288/1299/1605/80144/158326/3672/8515/22801/3679/8516/3680/3688/3690/3693/255743/9900/7058	21
hsa04360	Axon guidance	7.22073e-05	84448/658/659/818/1073/1944/1946/1948/55740/2042/2043/285220/2242/3611/3688/4233/10398/4756/4776/9423/59277/5063/84612/5335/55558/5364/5747/223117/9723/10505/7220/7223/8633	33
hsa04530	Tight junction	0.000117337	87/81/154796/154810/9181/10095/11149/911/912/10686/1366/2017/1740/1741/2064/3308/3688/83700/8777/58538/4628/4629/4633/4637/10398/100506658/84612/5521/5565/11346/7082	31
hsa04024	cAMP signaling pathway	0.000190996	8310/107/108/111/113/115/477/488/493/627/775/801/91860/818/10488/1909/2353/2550/2890/2891/2892/3351/3360/10398/4881/84876/5139/51196/5350/5500/4659/5733/22800/6262/7410/7434	36
hsa04713	Circadian entrainment	0.000258366	107/108/111/113/115/775/801/91860/818/2353/2775/55970/2890/2891/2892/3708/3760/9722/5592/6262/6263	21
hsa04911	Insulin secretion	0.00159519	6833/107/108/111/113/115/1388/477/775/818/1131/10488/3778/3779/27445/6262/6514/6844	18
hsa04151	PI3K-Akt signaling pathway	0.00161769	1388/627/894/1282/1285/1286/1287/1288/1299/10488/54541/1944/1946/1956/2064/2066/2246/2260/2263/55970/3326/3442/3480/3643/3667/3672/8515/22801/3679/8516/3680/3688/3690/3693/3717/9170/9863/4233/4803/4908/5105/5159/5521/5523/5747/57521/10110/7058	48
hsa04927	Cortisol synthesis and secretion	0.00172149	107/108/111/113/115/1388/775/10488/3708/3739/3777/3949/84876/5087/8622	15
hsa04910	Insulin signaling pathway	0.00200501	801/91860/2002/23265/10211/3098/3101/3632/3643/3667/5105/5256/5260/5500/79660/5507/5565/5576/5792/5837/57521/399694/10580/9322	24
hsa04925	Aldosterone synthesis and secretion	0.00243944	107/108/111/113/115/1388/477/493/775/801/91860/818/10488/3708/3777/3949/4881/84876/5587	19
hsa04350	TGF-beta signaling pathway	0.00403855	25805/652/657/658/659/2331/3398/3400/3624/4052/4756/6500/4092/4093/57154/7042/7043/9372	18
hsa04520	Adherens junction	0.00404773	87/81/29119/1956/2064/2260/3480/3643/4233/5792/10580/117178/7082/7414/8976	15
hsa04260	Cardiac muscle contraction	0.00422391	70/477/488/775/782/783/784/59283/845/1537/3270/4633/6262/7139/7168/7169/29796	17
hsa04015	Rap1 signaling pathway	0.00471363	107/108/111/113/115/801/91860/1944/1946/1956/55740/2246/2260/2263/2775/3480/3643/3688/3690/9170/9863/4233/4803/84612/5159/5217/51196/5335/5587/7094/7410	31
hsa04724	Glutamatergic synapse	0.00540369	107/108/111/113/115/775/1742/9229/2744/2775/55970/2890/2891/2892/2898/2901/2915/3708/3760/7220	20
hsa04728	Dopaminergic synapse	0.00577714	111/1388/775/801/91860/818/10488/2353/2774/2775/55970/2890/2891/2892/2931/3708/3760/3798/4129/5500/5521/5523	22
hsa05205	Proteoglycans in cancer	0.00604121	286/818/857/858/2017/1956/2002/2064/2066/2260/2317/8321/8322/8323/2719/3480/3688/3690/3693/3708/4233/51196/5335/5500/4659/4660/5747/22800/7042/7410	30
hsa05031	Amphetamine addiction	0.00759151	111/1388/775/801/91860/818/10488/2353/2354/2890/2891/2892/4129/5500	14
hsa04970	Salivary secretion	0.00759151	107/108/111/113/115/147/146/477/493/801/91860/1131/3708/3778/5592/6263/6844	17
hsa05230	Central carbon metabolism in cancer	0.00829382	1956/2064/2260/2263/2744/3098/3101/4233/4916/5159/5213/5214/6514/8140	14
hsa04934	Cushing syndrome	0.00829382	107/108/111/113/115/1388/8313/775/818/1031/10488/1856/1956/8321/8322/8323/3708/3739/3777/3949/84876/5087/50940/8622	24
hsa04392	Hippo signaling pathway - multiple species	0.0120282	84962/1454/79633/26524/11186/7005/126374/10413	8
hsa05032	Morphine addiction	0.0145914	107/108/111/113/115/2550/2557/2566/2775/55970/2869/3760/50940/5137/5139/8622	16
hsa05100	Bacterial invasion of epithelial cells	0.0196622	26084/10095/857/858/29119/2017/1793/3611/3688/4233/5747/399694/7414/8976	14
hsa04514	Cell adhesion molecules	0.0219117	214/83692/1000/10686/1366/1272/90952/2734/8516/3680/3688/83700/257194/4756/23114/22871/54413/9369/100506658/5792/5817/1462	22
hsa04213	Longevity regulating pathway - multiple species	0.0219117	107/108/111/113/115/1410/3310/3480/3643/3667/5565/57521	12
hsa04550	Signaling pathways regulating pluripotency of stem cells	0.0278139	8313/652/657/658/659/1856/80712/2260/2263/8321/8322/8323/3398/3400/3480/3624/3717/9314/4211/4093/463	21
hsa04918	Thyroid hormone synthesis	0.0380063	107/108/111/113/115/213/432/433/1388/477/10488/2878/3708	13
hsa04915	Estrogen signaling pathway	0.0380063	107/108/111/113/115/1388/801/91860/10488/1956/2353/2550/2775/3326/3310/3708/3760/3881/5241/399694	20
hsa04926	Relaxin signaling pathway	0.0381387	59/107/108/111/113/115/1388/1282/1285/1286/1287/1288/10488/1956/2353/2769/2775/55970/399694	19
hsa05146	Amoebiasis	0.038694	87/81/107/911/912/1282/1285/1286/1287/1288/2769/2774/5747/7042/7043/7414	16
hsa04310	Wnt signaling pathway	0.0445855	8313/25805/818/25776/894/1454/1488/80319/23500/1856/8321/8322/8323/8549/4776/85407/166336/4919/6422/6500/6907/84133	22
hsa04924	Renin secretion	0.045644	111/358/775/801/91860/1909/3708/3778/4881/84876/5137/5139	12
Advanced_Greenyellow
hsa05168	Herpes simplex virus 1 infection	1.31942e-19	208/10000/317/572/596/330/718/727/6347/1147/54205/1616/23586/5610/440275/1967/8892/8891/8890/1965/355/29915/3112/3455/8517/3654/51135/3661/3665/6885/57506/2475/4790/5290/5295/5296/5451/5452/5501/5781/57786/6009/6672/6714/6732/6426/6428/6429/6430/6431/6432/10929/10454/23118/6891/29110/7098/54106/7132/8717/7186/7189/7248/162239/57677/140612/22835/7539/339559/65243/284406/146198/7556/163227/94039/51…	265
hsa04120	Ubiquitin mediated proteolysis	4.7187e-10	10393/51529/25847/29882/29945/51433/51434/330/57448/672/8945/867/868/8881/8697/996/997/8454/8453/8452/8451/8450/8065/1642/1643/55070/1161/55120/26232/26272/23291/55294/26259/8925/8924/26091/10075/83737/55958/4214/23295/4281/4734/8554/9063/10401/23759/27339/25898/9886/6477/6502/64750/8651/7189/4591/9320/10054/9039/55236/7319/7320/7322/7323/51619/7324/7325/10477/7326/7327/7329/51465/118424/3093/733…	86
hsa03040	Spliceosome	1.00763e-08	22985/9716/10286/51362/988/51340/9416/11325/9879/1655/1665/8449/3178/3183/3190/4670/3192/3305/57461/57819/27258/23658/11157/51690/51691/55110/5093/5356/10450/10465/51645/10084/8559/27339/9129/84950/55119/9128/55660/24148/84991/55696/58517/494115/27288/6100/10291/10946/23451/10992/23450/10262/51639/10569/10285/23020/11017/6626/6627/6628/6629/6631/6632/6634/6635/6636/22938/6426/10772/6428/6429/6430…	88
hsa03013	RNA transport	6.1546e-06	8086/22985/1207/55308/11269/11218/1915/1964/10289/1967/8892/8891/8890/1965/8894/8661/8662/8664/3646/8665/8667/8668/8669/1974/1975/1977/9470/1979/1982/8672/1983/9669/55520/60528/2332/8087/8487/55110/55706/51068/57122/55746/9972/9631/23279/23511/23165/8021/129401/79023/348995/53371/79902/4927/9688/4928/29107/55916/26986/10605/51808/5411/100101267/10775/51367/10419/5903/5905/11102/10556/10557/10799/…	96
hsa03018	RNA degradation	6.45236e-05	10950/10438/23019/25904/4848/4850/57472/246175/29883/9337/55802/196513/1656/170506/22894/115752/80153/51013/5394/23404/51010/54512/118460/23016/11340/5393/3329/57819/27258/23658/11157/51690/51691/10200/131870/26986/9924/255967/5073/219988/5211/10140/9652/80349/54464/22803/84186	47
hsa03420	Nucleotide excision repair	0.000182884	902/1022/1069/8451/8450/1642/1643/2071/2072/2073/1161/2965/2967/404672/3978/4331/5424/10714/57804/5427/54107/5887/5981/5982/5983/5984/5985/6117/6118/7507/7508	31
hsa04141	Protein processing in endoplasmic reticulum	0.000280593	468/4287/596/824/8454/1603/1649/1650/79139/51009/3301/10294/3337/51726/54431/5611/80267/5610/440275/1965/27248/10961/26232/23193/9709/3320/7184/3305/22824/23640/10808/3998/10905/11253/57134/5609/4217/5601/8720/51360/4780/55666/5034/9373/10113/5887/6048/6185/56681/51128/10484/10802/10427/9871/25956/29927/55176/10952/23480/7095/11231/6400/6747/201595/258010/7186/23471/7991/7322/7323/51619/7326/7327…	84
hsa04140	Autophagy - animal	0.000280593	208/10000/83734/9140/9776/22863/55054/23130/55102/64422/115201/84938/84971/9474/572/596/664/8837/64798/440275/1965/11337/23710/3146/3476/3845/6885/5594/5595/5601/22808/8897/9110/2475/5289/5290/5295/5296/30849/5516/5562/5563/5567/5728/5861/83452/7879/5894/9821/6009/6198/6199/10670/10325/64121/51100/9342/6794/55014/55578/10010/29110/7189/7248/8408/9706/7405/55255/55062/26100	70
hsa03430	Mismatch repair	0.000375286	9156/3978/4292/27030/4436/4437/2956/5424/10714/57804/5981/5982/5983/5984/5985/6117/6118/6742	18
hsa00310	Lysine degradation	0.000677149	10157/38/39/224/501/223/55870/79823/23127/55526/1738/1743/1962/79813/2145/3030/123688/4297/9757/58508/55904/64324/85007/51268/5352/7799/9739/23067/29072/80854/9869/83852/150572/56950/64754/79723/55217	37
hsa04110	Cell cycle	0.000677149	10393/51529/25847/29882/29945/51433/51434/472/545/701/890/891/9133/902/8556/8555/8881/8697/993/996/8317/1017/1021/1022/1027/1032/1111/11200/8454/1871/1874/1875/10912/2932/3065/3066/4085/4172/4173/4175/4999/23595/5000/5001/9232/5885/5933/5934/6502/4087/4088/4089/8243/9126/10274/10735/7027/7040/7272/7465/7532/10971/7709	63
hsa00900	Terpenoid backbone biosynthesis	0.000677149	38/39/79947/2224/2339/9453/3156/3157/23463/3422/4597/4598/116150/23590/57107/10654/10269	17
hsa03030	DNA replication	0.000799719	1763/3978/4172/4173/4175/5422/5424/10714/57804/5427/54107/5557/5558/5981/5982/5983/5984/5985/246243/79621/84153/6117/6118/6742	24
hsa00640	Propanoate metabolism	0.000799719	31/32/35/38/39/55902/79611/4329/1629/1738/55862/1962/3030/26275/3939/160287/92483/23417/5095/5096/8803/8802/8801	23
hsa04071	Sphingolipid signaling pathway	0.00235034	208/10000/596/29956/91012/253782/8560/123099/2205/2770/2773/2776/3845/4217/5594/5600/6300/1432/5595/5601/2206/4790/8439/5290/5295/5296/23236/5331/5332/5337/5516/5519/5520/55844/55012/5525/5526/5527/5528/5529/5578/5579/5728/5894/387/6093/9475/8698/259230/166929/81537/130367/8877/56848/10558/55304/7132/8717/7186	59
hsa04136	Autophagy - other	0.00301141	83734/9140/9776/55054/23130/55102/64422/115201/84938/84971/9474/11337/23710/3476/2475/5289/30849/5516/9706/55062/26100	21
hsa03022	Basal transcription factors	0.00309252	902/1022/2071/2957/2958/2960/2961/2963/2965/2967/404672/2969/4331/6872/6881/6882/6883/6884/8148/6873/83860/6877/27097/6879/51616/6908/9519	27
hsa05017	Spinocerebellar ataxia	0.00309252	11047/10939/208/10000/9776/22863/23130/55102/6310/25814/342371/6311/4287/23152/54205/2259/2776/2906/116444/3709/4217/5601/90550/2475/4800/115209/4976/5289/5290/5295/5296/30849/23236/5331/5332/5578/5579/5684/5685/5686/5690/5700/5701/5702/5704/5705/5706/5707/5717/5718/5719/5708/9861/5713/5714/9698/23369/9821/6095/6908/9519/7186/8408/9706/7417/7419/55062/26100	68
hsa04130	SNARE interactions in vesicular transport	0.00481981	10282/662/9527/9570/9554/8773/9342/8675/55014/53407/415117/2054/6811/8417/9482/55850/6843/9341/8674/6845/143187	21
hsa04150	mTOR signaling pathway	0.00811132	208/10000/529/673/51719/81617/1147/6249/9681/64798/1855/1975/1977/9470/96459/7855/8324/2887/2932/3845/55004/8649/389541/10542/23175/9663/4040/5594/5595/79109/54468/2475/8131/5290/5295/5296/5562/5563/5578/5579/55615/5728/5894/6009/387/253260/6198/6199/10670/10325/64121/81929/83667/6502/153129/6654/6655/6794/92335/55437/9894/7132/7248/9675/8408/9706/84219/79726/7480/7482/54361	71
hsa00280	Valine, leucine and isoleucine degradation	0.0104989	65985/30/34/35/36/38/39/224/4329/501/223/316/549/587/1629/1738/1962/3030/26275/54511/3157/3028/3712/56922/64087/5095/5096	27
hsa00620	Pyruvate metabolism	0.0104989	31/32/38/39/55902/97/224/501/223/1737/1738/2271/2739/3029/3939/160287/92483/197257/4191/4199/5091/5162/5315	23
hsa05014	Amyotrophic lateral sclerosis	0.018459	55860/11047/57679/311/317/468/9776/22863/23130/55102/6311/572/596/25978/9377/1337/1339/1351/54205/1616/10540/11258/51164/84516/10671/1649/79139/127602/8632/1767/1768/56171/83544/7802/1965/11337/23710/2882/493869/2906/9001/10013/3178/3181/3799/3831/147700/5608/4217/5600/6300/1432/9782/90550/2475/55706/4705/126328/51079/4697/4698/4702/54539/4708/4711/4713/4719/4720/4722/374291/4731/3084/57122/55746…	147
hsa00563	Glycosylphosphatidylinositol (GPI)-anchor biosynthesis	0.0188407	80055/9488/5279/5281/10026/9487/93183/23556/51227/9091/94005/51604/128869/55650/284098/54965	16
hsa03060	Protein export	0.0193343	5018/23478/90701/29927/55176/10952/23480/7095/11231/28972/6727/6728/6729/6731/6726	15
hsa03440	Homologous recombination	0.0226888	472/29086/580/672/675/79184/83990/4683/79728/5424/10714/57804/10111/5890/25788/6117/6118/6742/50511/7156/11073/51720/7517	23
hsa04218	Cellular senescence	0.0226888	208/10000/472/545/8945/824/890/891/9133/993/1017/1021/1111/11200/1871/1874/1875/2113/23291/2308/2309/10912/204851/10114/3364/3486/3709/3845/91750/286826/5608/5594/5600/6300/1432/5595/90550/22808/2475/4683/4775/4790/5290/5295/5296/5481/5501/5530/5532/5533/5534/5728/5810/10111/144715/5894/5933/5934/6009/4087/4088/7040/7046/7048/10758/59341/7248/7417/7419	69
hsa05210	Colorectal cancer	0.0337469	208/10000/324/26060/369/8312/572/596/673/54205/1643/10912/2932/3845/51176/5594/5595/5601/4292/4436/4437/2956/2475/5290/5295/5296/51426/5894/387/6198/6199/4087/4088/4089/6654/6655/6932/6934/7040/7046/7048	41
hsa03410	Base excision repair	0.0337469	328/3146/3978/3980/8930/4350/4595/252969/55247/4968/10038/5423/5424/10714/57804/5427/54107/6996/7374	19
hsa05132	Salmonella infection	0.0445052	10006/64746/55860/57180/79026/113146/208/10000/382/10552/10109/596/330/55845/837/1147/1434/54205/10540/11258/51164/84516/10671/1781/51143/1783/79659/51626/8655/83658/83657/6993/6990/63916/60412/10640/26263/9648/79792/3320/7184/8517/3654/51135/3799/3831/147700/3836/3839/3840/51176/6416/5608/5609/6885/5594/5600/6300/1432/5595/5601/10627/103910/4646/4790/10392/5058/5286/5289/5290/5585/23207/5420/586…	102
Advanced_Midnightblue
hsa03010	Ribosome	1.73395e-40	2197/64928/79590/9553/64979/51023/54460/4736/6136/6143/6147/6152/6155/6157/6159/6156/6160/6161/6164/11224/6165/25873/6167/6168/6169/6170/6171/6129/6133/6204/6205/6206/6208/6210/6218/6222/6230/51065/6235/6193/6194/6201/7311	43
hsa05171	Coronavirus disease - COVID-19	1.61006e-25	2197/4736/6136/6143/6147/6152/6155/6157/6159/6156/6160/6161/6164/11224/6165/25873/6167/6168/6169/6170/6171/6129/6133/6204/6205/6206/6208/6210/6218/6222/6230/51065/6235/6193/6194/6201/7311	37
hsa05012	Parkinson disease	4.68552e-20	1327/1329/1340/1345/1347/9167/1349/1350/4694/55967/4696/4700/4701/4706/4716/4709/4710/4714/4715/4717/4724/4729/5682/5683/5688/5689/5692/5695/6390/7295/7311/7381/27089	33
hsa00190	Oxidative phosphorylation	8.3635e-19	1327/1329/1340/1345/1347/9167/1349/1350/4694/55967/4696/4700/4701/4706/4716/4709/4710/4714/4715/4717/4724/4729/6390/7381/27089	25
hsa04932	Non-alcoholic fatty liver disease	9.42986e-19	1327/1329/1340/1345/1347/9167/1349/1350/4694/55967/4696/4700/4701/4706/4716/4709/4710/4714/4715/4717/4724/4729/6390/9021/7381/27089	26
hsa05016	Huntington disease	1.61348e-17	1327/1329/1340/1345/1347/9167/1349/1350/4694/55967/4696/4700/4701/4706/4716/4709/4710/4714/4715/4717/4724/4729/5435/5437/5682/5683/5688/5689/5692/5695/6390/7381/27089	33
hsa04714	Thermogenesis	3.66824e-17	51287/84987/1327/1329/1340/1345/1347/9167/1349/1350/4694/55967/4696/4700/4701/4706/91942/4716/4709/4710/4714/4715/4717/4724/4729/6194/6390/7381/27089	29
hsa05020	Prion disease	3.66824e-17	1327/1329/1340/1345/1347/9167/1349/1350/4694/55967/4696/4700/4701/4706/4716/4709/4710/4714/4715/4717/4724/4729/5682/5683/5688/5689/5692/5695/6390/7381/27089	31
hsa05014	Amyotrophic lateral sclerosis	1.23125e-13	1327/1329/1340/1345/1347/9167/1349/1350/4694/55967/4696/4700/4701/4706/4716/4709/4710/4714/4715/4717/4724/4729/5682/5683/5688/5689/5692/5695/6390/7381/27089	31
hsa05010	Alzheimer disease	1.61787e-13	1327/1329/1340/1345/1347/9167/1349/1350/4694/55967/4696/4700/4701/4706/4716/4709/4710/4714/4715/4717/4724/4729/5682/5683/5688/5689/5692/5695/6390/7381/27089	31
hsa05022	Pathways of neurodegeneration - multiple diseases	2.38114e-11	1327/1329/1340/1345/1347/9167/1349/1350/4694/55967/4696/4700/4701/4706/4716/4709/4710/4714/4715/4717/4724/4729/5682/5683/5688/5689/5692/5695/6390/7311/7381/27089	32
hsa04723	Retrograde endocannabinoid signaling	9.68873e-07	4694/55967/4696/4700/4701/4706/4716/4709/4710/4714/4715/4717/4724/4729	14
hsa04260	Cardiac muscle contraction	1.09675e-05	1327/1329/1340/1345/1347/9167/1349/1350/7381/27089	10
hsa03050	Proteasome	0.000733887	5682/5683/5688/5689/5692/5695	6
Advanced_Pink
hsa04080	Neuroactive ligand-receptor interaction	0.012588	1135/1136/1138/1140/1813/1816/2554/2567/2570/2693/2895/2899/116443/2912/2914/2916/4160/10316/8620/10886/6343/83551/6866/114131/257313	25
Advanced_Salmon
hsa04211	Longevity regulating pathway	0.0299963	112/60673/847/10919/3265/5291/5970/27244/7249	9
hsa05165	Human papillomavirus infection	0.0299963	155066/9550/1284/1291/1292/1857/2535/3265/3675/3696/5605/4854/5291/5518/3516/5970/23513/83439/7249	19
Advanced_Yellow
hsa04080	Neuroactive ligand-receptor interaction	3.61164e-25	134/150/151/153/155/186/8862/551/680/796/886/1081/57053/1137/55584/1142/1145/1392/1394/1395/1814/1907/1908/2147/2488/9568/2556/2558/2559/2560/2565/55879/200959/2689/2691/51738/2740/8001/2893/2900/2902/2904/2913/3060/3062/3354/3358/3361/3362/3375/3827/23566/56413/4158/4159/4161/4295/4543/4544/4829/10874/2831/2832/64106/283869/4852/4985/4988/5020/5173/5340/5617/51052/113091/5697/122042/51289/6750/6…	85
hsa04950	Maturity onset diabetes of the young	6.73726e-11	3170/3171/6927/6928/3172/3375/3630/3110/50674/4821/4825/3175/5078/3651/5313/222546	16
hsa05033	Nicotine addiction	1.62551e-05	774/1137/2556/2558/2559/2560/2565/55879/200959/2893/2902/2904/57084/140679	14
hsa04976	Bile secretion	0.000517393	8647/114/343/23439/570/1080/8431/6555/6580/10864/9376/6523/10599/28234/54658/54578/7366/54490/7363	19
hsa04727	GABAergic synapse	0.00133985	114/774/9568/2556/2558/2559/2560/2565/55879/200959/2572/51764/94235/2792/5582/140679/10991/6538	18
hsa05032	Morphine addiction	0.00153149	114/134/774/9568/2556/2558/2559/2560/2565/55879/200959/51764/94235/2792/3765/4988/5582/140679	18
hsa04060	Cytokine-cytokine receptor interaction	0.00165203	27302/6361/10850/1437/1440/10913/2056/2658/2689/3446/3448/3451/3440/3444/3445/282616/3467/3596/3605/27189/112744/84639/8808/3558/50604/53832/59067/50616/64806/55801/3562/27179/26525/27178/3578/3626/4049/5617/115650	39
hsa04742	Taste transduction	0.0019151	114/954/9568/2556/2558/2559/346562/51764/10021/3354/9177/170572/6340/80834/50834/50833/29850	17
hsa04630	JAK-STAT signaling pathway	0.0181476	1437/1440/1950/2056/2689/3446/3448/3451/3440/3444/3445/282616/3467/3596/3558/50604/53832/59067/50616/116379/3562/3578/5617	23
hsa04726	Serotonergic synapse	0.0199438	774/1557/1559/1644/2560/51764/94235/2792/3354/3358/9177/170572/3361/3362/3765/255189/5582/121278	18
hsa04713	Circadian entrainment	0.0199438	55811/114/8911/51806/51764/94235/2792/2893/2902/2904/3765/4543/4544/4842/5582/5593	16
hsa04610	Complement and coagulation cascades	0.0386029	730/731/3080/81494/2165/2147/2158/2243/2244/2266/3818/3827/4153/5340	14
hsa00601	Glycosphingolipid biosynthesis - lacto and neolacto series	0.0386029	8708/10331/2524/2525/2527/2528/10690	7
